# Supplementary material
Source: PubMed Central journal article supplement (PMC3792725)
Supplement: supp_kwt098_kwt098supp.pdf [file supp_kwt098_kwt098supp.pdf]

| <b>Web Table 1. Characteristics of previously published studies of CRP and ovarian cancer risk</b> |                                                                                                                                                                           |                                 |                                           |                                            |                                                                                                                                            |                                                                                                                                                                                                                                 |
|----------------------------------------------------------------------------------------------------|---------------------------------------------------------------------------------------------------------------------------------------------------------------------------|---------------------------------|-------------------------------------------|--------------------------------------------|--------------------------------------------------------------------------------------------------------------------------------------------|---------------------------------------------------------------------------------------------------------------------------------------------------------------------------------------------------------------------------------|
| <b>Reference</b>                                                                                   | <b>Study population</b>                                                                                                                                                   | <b>N cases/N controls</b>       | <b>Serum or plasma</b>                    | <b>Assay</b>                               | <b>Tertile cutpoints (mg/L)</b>                                                                                                            | <b>Analysis/Adjustment Factors</b>                                                                                                                                                                                              |
| McSorley et al., 2007                                                                              | CLUE, CLUE II, the Columbia, MO serum bank, the Island of Guernsey Prospective Study                                                                                      | 166 invasive cases/335 controls | Serum (except CLUE II, which used plasma) | High sensitivity ELISA                     | Not provided; manuscript notes that study-specific tertiles were used.                                                                     | Unconditional logistic regression, adjusted for age, race, menopausal status, time since last menstrual period (among pre-menopausal women), current post-menopausal hormone use, date and time of day of blood draw, and study |
| Lundin et al., 2009                                                                                | New York University Women's Health Study (NYUWHS), Northern Swedish Health and Disease Study (NSHDS), Study of Hormones and Diet in the Etiology of Breast Cancer (ORDET) | 237 cases/427 controls          | Serum (except NSHDS, which used plasma)   | High sensitivity immunoturbidometric assay | NSHDS:<br>1 <0.84<br>2 0.85-2.06<br>3 ≥2.07<br>NYUWHS:<br>1 <1.17<br>2 1.18-2.94<br>3 ≥2.95<br>ORDET:<br>1 <0.91<br>2 0.92-1.96<br>3 ≥1.97 | Conditional logistic regression, adjusted for body mass index                                                                                                                                                                   |
| Toriola et al., 2011                                                                               | Finnish Maternity Cohort                                                                                                                                                  | 140 cases/170 controls          | Serum                                     | High sensitivity immunoturbidometric assay | 1 <1.6<br>2 1.6-≤3.9<br>3 >3.9                                                                                                             | Conditional logistic regression, adjusted for age at first full-term pregnancy                                                                                                                                                  |
| Present study                                                                                      | Nurses' Health Study                                                                                                                                                      | 376 cases NHS/NHSII             | Plasma                                    | High sensitivity immunoturbidometric       | NHS/NHSII:<br>1 <0.72                                                                                                                      | NHS: Unconditional logistic regression,                                                                                                                                                                                         |

|  |                                                 |                                                                                                         |  |       |                                                                     |                                                                                                                                                                                                                                                                                                                                                                                                                                      |
|--|-------------------------------------------------|---------------------------------------------------------------------------------------------------------|--|-------|---------------------------------------------------------------------|--------------------------------------------------------------------------------------------------------------------------------------------------------------------------------------------------------------------------------------------------------------------------------------------------------------------------------------------------------------------------------------------------------------------------------------|
|  | (NHS/NHSII)<br>Women's<br>Health Study<br>(WHS) | had 513<br>controls;<br>WHS<br>measured<br>CRP in all<br>participant<br>who gave<br>blood<br>(N=28,345) |  | assay | 2 0.72-<2.36<br>3 ≥2.36<br>WHS<br>1 <1.15<br>2 1.15-3.38<br>3 ≥3.39 | adjusting for matching<br>factors (age at blood<br>draw, date and time of<br>day of blood draw, fasting<br>status, menopause status<br>at diagnosis and blood<br>draw, post-menopausal<br>hormone use at blood<br>draw), BMI, duration of<br>OC use, tubal ligation,<br>and parity<br>WHS: Cox proportional<br>hazards regression,<br>adjusting for age,<br>randomization, BMI,<br>duration of OC use, tubal<br>ligation, and parity |
|--|-------------------------------------------------|---------------------------------------------------------------------------------------------------------|--|-------|---------------------------------------------------------------------|--------------------------------------------------------------------------------------------------------------------------------------------------------------------------------------------------------------------------------------------------------------------------------------------------------------------------------------------------------------------------------------------------------------------------------------|

**Web Table 2. Associations between quartiles of CRP and ovarian cancer risk, excluding cases in various timepoints between blood draw and diagnosis**

| <b>Excluding cases diagnosed within 2 years</b> |                            |                            |                                                         |                          |
|-------------------------------------------------|----------------------------|----------------------------|---------------------------------------------------------|--------------------------|
| <b>CRP</b>                                      | <b>NHS<br/>N=191 cases</b> | <b>WHS<br/>N=142 cases</b> | <b>Combined RR (95% CI)<sup>a</sup><br/>N=333 cases</b> | <b>p-het<sup>b</sup></b> |
| Quartile 1                                      | 1.00                       | 1.00                       | <b>1.00</b> (ref.)                                      |                          |
| Quartile 2                                      | 1.10                       | 1.47                       | <b>1.26</b> (0.88, 1.81)                                | 0.43                     |
| Quartile 3                                      | 0.94                       | 1.84                       | <b>1.32</b> (0.68, 2.54)                                | 0.08                     |
| Quartile 4                                      | 1.23                       | 1.68                       | <b>1.44</b> (0.97, 2.14)                                | 0.44                     |

| <b>Excluding cases diagnosed within 5 years</b> |                            |                            |                                                   |                          |
|-------------------------------------------------|----------------------------|----------------------------|---------------------------------------------------|--------------------------|
|                                                 | <b>NHS<br/>N=164 cases</b> | <b>WHS<br/>N=107 cases</b> | <b>Combined RR (95% CI)<sup>a</sup><br/>N=271</b> | <b>p-het<sup>b</sup></b> |
| Quartile 1                                      | 1.00                       | 1.00                       | <b>1.00</b> (ref.)                                |                          |
| Quartile 2                                      | 1.11                       | 1.56                       | <b>1.29</b> (0.87, 1.91)                          | 0.41                     |
| Quartile 3                                      | 0.94                       | 1.95                       | <b>1.34</b> (0.66, 2.74)                          | 0.08                     |
| Quartile 4                                      | 1.19                       | 1.69                       | <b>1.39</b> (0.89, 2.16)                          | 0.44                     |

| <b>Excluding cases diagnosed within 10 years</b> |                            |                           |                                                   |                          |
|--------------------------------------------------|----------------------------|---------------------------|---------------------------------------------------|--------------------------|
|                                                  | <b>NHS<br/>N=106 cases</b> | <b>WHS<br/>N=53 cases</b> | <b>Combined RR (95% CI)<sup>a</sup><br/>N=159</b> | <b>p-het<sup>b</sup></b> |
| Quartile 1                                       | 1.00                       | 1.00                      | <b>1.00</b> (ref.)                                |                          |
| Quartile 2                                       | 1.21                       | 1.90                      | <b>1.41</b> (0.84, 2.36)                          | 0.41                     |
| Quartile 3                                       | 0.82                       | 3.09                      | <b>1.55</b> (0.42, 5.69)                          | <b>0.02</b>              |
| Quartile 4                                       | 1.35                       | 1.71                      | <b>1.46</b> (0.82, 2.60)                          | 0.71                     |

<sup>a</sup>Relative risks and 95% confidence intervals determined by random effects meta-analysis of estimates from the NHS/NHSII nested case-control study and the WHS Cox proportional hazards model and adjusting for matching factors (NHS/NHSII only), oral contraceptive use (never, <5 yrs, 5+ yrs), tubal ligation (yes vs. no), parity (continuous), and BMI at blood draw (continuous)

<sup>b</sup>Determined using random effects meta-analysis comparing risk estimates across studies.
